# Supplementary material for: TP53 Mutational Status-Based Genomic Signature for Prognosis and Predicting Therapeutic Response in Pancreatic Cancer
Source: Front Cell Dev Biol. 2021 May 26;9:665265. doi: 10.3389/fcell.2021.665265 (PMC8187932; doi:10.3389/fcell.2021.665265)
Supplement: Supplementary file 3 [file Table_3.XLS]

## Sheet: 1577740818@qq.comcmepjttfwe
	ARNT2	LINC01559	SLC26A11	TRIM67	UCA1
Cell Type: CAF FAP,Subtype: Exclusion, Platform: Microarray	0.0818268	0	-0.508465	0	-1.09267
Cell Type: MDSC,Subtype: Exclusion, Platform: Microarray	0.260895	-0.0110047	-2.46094	0.0262952	4.80817
Cell Type: TAM M2,Subtype: Exclusion, Platform: Microarray	-0.451738	0	0.324215	0.646621	0
Cohort: E-MTAB-179, Cancer: Brain, Subtype: Neuroblastoma, Platform: Microarray, Survival: OS	-0.0524009	-0.443768	2.42057	0	0
Cohort: Freeman 2019, Cancer: Melanoma, Subtype: B16, Platform: CRISPR, Condition: NK	-2.18401	0	-0.773857	2.60852	0
Cohort: Freeman 2019, Cancer: Melanoma, Subtype: B16, Platform: CRISPR, Condition: OT1	0.352914	0	2.03103	0.135766	0
Cohort: GSE12417_GPL570, Cancer: Leukemia, Subtype: AML, Platform: Microarray, Survival: OS	1.62855	0	1.16992	0	-0.0213375
Cohort: ICB_Braun2020_PD1, Cancer: Kidney, Subtype: Clear, Platform: RNASeq, Survival: OS	1.10006	0	0	0	0
Cohort: ICB_Gide2019_PD1+CTLA4, Cancer: Melanoma, Subtype: , Platform: RNASeq, Survival: OS	-0.156126	0	1.86627	0.060632	0
Cohort: ICB_Gide2019_PD1, Cancer: Melanoma, Subtype: , Platform: RNASeq, Survival: OS	-0.451807	0	-0.178374	-1.35908	0
Cohort: ICB_Hugo2016_PD1, Cancer: Melanoma, Subtype: , Platform: RNASeq, Survival: OS	-1.86614	0	0.104354	1.54575	0
Cohort: ICB_Lauss2017_ACT, Cancer: Melanoma, Subtype: , Platform: RNASeq, Survival: OS	1.40893	0	0.928979	1.22372	0
Cohort: ICB_Liu2019_PD1, Cancer: Melanoma, Subtype: Ipi_Naive, Platform: RNASeq, Survival: OS	-0.161262	-0.776267	0.417721	-1.43674	0
Cohort: ICB_Liu2019_PD1, Cancer: Melanoma, Subtype: Ipi_Prog, Platform: RNASeq, Survival: OS	1.23454	0.113747	-0.576059	0.424084	0
Cohort: ICB_Mariathasan2018_PDL1, Cancer: Bladder, Subtype: mUC, Platform: RNASeq, Survival: OS	-0.833881	0.0903071	-0.662529	-0.885639	-1.35628
Cohort: ICB_Miao2018_ICB, Cancer: Kidney, Subtype: Clear, Platform: RNASeq, Survival: OS	0.906126	0.368605	-0.268631	0	0
Cohort: ICB_Nathanson2017_CTLA4, Cancer: Melanoma, Subtype: Pre, Platform: RNASeq, Survival: OS	-0.76964	0	1.82654	-0.650012	-1.85207
Cohort: ICB_Riaz2017_PD1, Cancer: Melanoma, Subtype: Ipi_Naive, Platform: RNASeq, Survival: OS	-0.266397	0	0.883887	0.556564	1.00924
Cohort: ICB_Riaz2017_PD1, Cancer: Melanoma, Subtype: Ipi_Prog, Platform: RNASeq, Survival: OS	1.28518	0	1.95711	1.60941	0.446902
Cohort: ICB_VanAllen2015_CTLA4, Cancer: Melanoma, Subtype: , Platform: RNASeq, Survival: OS	0.704626	0	-1.07542	0.770145	0
Cohort: ICB_Zhao2019_PD1, Cancer: Glioblastoma, Subtype: , Platform: RNASeq, Survival: OS	-1.491	0	-2.66191	0.833323	0
Cohort: Kearney 2018, Cancer: Colon, Subtype: MC38, Platform: CRISPR, Condition: NK_10	0.545608	0	0.109792	0.235581	0
Cohort: Kearney 2018, Cancer: Colon, Subtype: MC38, Platform: CRISPR, Condition: NK_20	0.683609	0	-1.21856	-0.274836	0
Cohort: Kearney 2018, Cancer: Colon, Subtype: MC38, Platform: CRISPR, Condition: T_IgG	0.190959	0	1.88575	0.336502	0
Cohort: Kearney 2018, Cancer: Colon, Subtype: MC38, Platform: CRISPR, Condition: T_PD1	-1.11855	0	0.619356	-0.281398	0
Cohort: METABRIC, Cancer: Breast, Subtype: TN, Platform: Microarray, Survival: OS	-0.239504	0	-0.316766	-1.64077	0
Cohort: Manguso 2017, Cancer: Melanoma, Subtype: B16, Platform: CRISPR, Condition: GVAX	0	0	-0.665012	0	0
Cohort: Manguso 2017, Cancer: Melanoma, Subtype: B16, Platform: CRISPR, Condition: GVAX+PD1	0	0	-1.12153	0	0
Cohort: Pan 2018, Cancer: Melanoma, Subtype: B16, Platform: CRISPR, Condition: OT1	1.25512	0	-0.584442	0.308752	0
Cohort: Pan 2018, Cancer: Melanoma, Subtype: B16, Platform: CRISPR, Condition: Pmel1	-2.22257	0	-1.68636	1.59511	0
Cohort: Patel 2017, Cancer: Melanoma, Subtype: Mel624, Platform: CRISPR, Condition: 1	-0.285339	0	-2.12079	0.443131	0
Cohort: Patel 2017, Cancer: Melanoma, Subtype: Mel624, Platform: CRISPR, Condition: 2	-1.24763	0	-0.274624	-0.481808	0
Cohort: Pech 2019, Cancer: Leukemia, Subtype: K562, Platform: CRISPR, Condition: NK_E/T=1	0.00782357	0	-1.97108	-0.353901	0
Cohort: Pech 2019, Cancer: Leukemia, Subtype: K562, Platform: CRISPR, Condition: NK_E/T=2.5	0.0826191	0	-1.01761	-0.549721	0
Cohort: Shifrut 2018, Cancer: Donor, Subtype: T cell, Platform: CRISPR, Condition: Average	-0.305122	0	0.0906415	0.909535	0
Cohort: TCGA, Cancer: Endometrial, Subtype: , Platform: RNASeq, Survival: OS	2.15028	-0.782537	-1.57186	-1.67675	-0.0401207
Cohort: TCGA, Cancer: Melanoma, Subtype: Metastatic, Platform: RNASeq, Survival: OS	-0.549697	-0.173199	-1.11545	-1.17701	1.35311
Cohort: Vredevoogd 2019, Cancer: Melanoma, Subtype: D10 IFNGR1-, Platform: CRISPR, Condition: MART1	-0.271358	0	1.07278	0.865339	0
